# Supplementary material for: Patterns in Outpatient Benzodiazepine Prescribing in the United States
Source: PubMed Central journal article supplement (PMC6484578; doi:10.1001/jamanetworkopen.2018.7399), 2019-01-25
Supplement: jamanetwopen-2-e187399-s001.pdf [file jamanetwopen-2-e187399-s001.pdf]

## Supplementary Online Content

Agarwal SD, Landon BE. Patterns in outpatient benzodiazepine prescribing in the United States. *JAMA Netw Open*. 2019;2(1):e187399. doi:10.1001/jamanetworkopen.2018.7399

**eMethods.** List of Benzodiazepines, Opioids, Nonbenzodiazepine Sedative Hypnotics (and Other Sleep Drugs), Muscle Relaxants, and Antipsychotics

**eTable 1.** RFV and *ICD-9-CM* Codes for Indication Categories

**eTable 2.** Characteristics of All Visits, 2003-2015

**eTable 3.** Benzodiazepine Prescribing Rate by Year, by Specialty and Indication, 2003-2015

**eTable 4.** Predictors Associated With Use of Benzodiazepines

This supplementary material has been provided by the authors to give readers additional information about their work.

**eMethods.** List of Benzodiazepines, Opioids, Nonbenzodiazepine Sedative Hypnotics (and Other Sleep Drugs), Muscle Relaxants, and Antipsychotics

**Full list of benzodiazepines (generic and brand-name)**

Starred (\*) entries indicate benzodiazepines that were categorized as short-acting. All others were categorized as long-acting.

- Chlordiazepoxide, Chlordiazepoxide HCl with clidinium bromid, Librix, Librium
- \*Alprazolam, \*Xanax, \*Xanax XR, Niravam
- \*Oxazepam, \*Serax
- Diazepam, Valium, Diastat, Diastat Acudial
- Clonazepam, Klonopin
- \*Estazolam, \*Prosom
- Flurazepam, Dalmane
- \*Triazolam, \*Halcion
- Clorazepate, Clorazepate dipotassium, Tranxene T, Tranxene
- \*Lorazepam, \*Ativan
- \*Temazepam, \*Restoril
- Clobazam, Onfi
- \*Midazolam, \*Midazolam HCl, \*Versed

**Full list of opioids, non-benzodiazepine sedative-hypnotics (and other sleep drugs), muscle relaxants, and antipsychotics**

Opioids

- Buprenorphine, Buprenorphine-Naloxone, Buprenex, Butrans, Subutex
- Butorphanol Tartrate, Stadol
- Codeine, Acetaminophen with Codeine, APAP with Codeine, Codeine Phosphate, Codeine Sulfate, Butalbital-ASA-Caffeine-Codeine, Fiorinal with Codeine, Guaifenesin with Codeine, Phenergan Vc Expectorant with Codeine, Phenergan with Codeine, Promethazine Vc with Codeine, Promethazine with Codeine, Tylenol with Codeine, Robitussin with Codeine, Fioricet/Codeine
- Fentanyl, Fentanyl Citrate, Duragesic, Fentora, Subsys, Sublimaze
- Hydrocodone, Homatropine-Hydrocodone, Guaifenesin-Hydrocodone, Chlorpheniramine/Hydrocodone, Hydrocodone/Ibuprofen, Hydrocodone with Acetaminophen, Hydrocodone Compound, Acetaminophen-Hydrocodone, Lortab Elixir, Lortab, Norco, Vicodin, Vicodin ES, Vicodin HP
- Hydromorphone, Dilaudid, Exalgo
- Meperidine, Meperidine HCl, Demerol, Meperitab
- Methadone, Dolophine
- Morphine, Morphine ER, Morphine Sulfate, MS Contin, Kadian, Roxanol, Avinza, Duramorph
- Nalbuphine HCl, Nubain
- Nucynta

- Oxycodone, Acetaminophen W/Oxycodone, Oxycodone ER, Oxycodone CR, Oxycodone HCl, Oxycodone HCl & Acetaminophen, Oxycodone with APAP, Oxycodone with ASA, Oxycontin, Roxicodone, OxyIR, Oxyfast, Percocet, Percocet-5, Percocet 7.5, Percocet 10
- Oxymorphone, Opana, Opana ER
- Propoxyphene, Propoxyphene HCl with Acetaminophen, Darvon, Darvon Compound
- Talwin Nx
- Tramadol, Tramadol HCl, Acetaminophen-Tramadol, Ultram ER, Ultram

#### Non-benzodiazepine sedative-hypnotics (and other sleep drugs)

- Eszopiclone, Lunesta
- Zolpidem, Zolpidem Tartrate, Ambien CR, Ambien, Edluar, Intermezzo
- Zaleplon, Sonata
- Ramelteon, Rozerem
- Belsomra

#### Muscle relaxants

- Baclofen, Lioresal
- Carisoprodol, Soma
- Chlorzoxazone
- Cyclobenzaprine HCl, Flexeril, Amrix
- Dantrolene
- Metaxalone, Skelaxin
- Methocarbamol\_Robaxin-750, Robaxin

- Orphenadrine
- Tizanidine , Zanaflex

#### Antipsychotics

- Aripiprazole, Abilify
- Asenapine, Saphris
- Chlorpromazine
- Clozapine, Clozaril, Fazaclo
- Fluphenazine, Fluphenazine Decanoate
- Haloperidol, Haloperidol Deconate, Haloperidol Lactate, Haldol Decanoate, Haldol
- Fanapt
- Loxapine
- Lurasidone, Latuda
- Olanzapine, Olanzapine/Fluoxetine, Zyprexa, Zyprexa Zydis
- Paliperidone, Invega, Invega Sustenna
- Perphenazine, Perphenazine with Amitriptyline, Amitriptyline HCl with Perphenazine
- Quetiapine Fumarate, Seroquel XR, Seroquel
- Risperidone, Risperdal
- Thioridazine
- Thiothixene , Navane
- Trifluoperazine
- Ziprasidone HCl, Geodon

**eTable 1.** RFV and ICD-9-CM Codes for Indication Categories

| Indication             | RFV and ICD-9-CM Codes                                                                                                                                                                                                                                                                                                                                                                                                                                                                                                                                                                                                                                                                                                                                                                                                                                                                                        |
|------------------------|---------------------------------------------------------------------------------------------------------------------------------------------------------------------------------------------------------------------------------------------------------------------------------------------------------------------------------------------------------------------------------------------------------------------------------------------------------------------------------------------------------------------------------------------------------------------------------------------------------------------------------------------------------------------------------------------------------------------------------------------------------------------------------------------------------------------------------------------------------------------------------------------------------------|
| Anxiety and depression | <p>ICD-9-CM:<br/>           290.13, 290.21, 290.43, 296.2-, 296.20, 296.21, 296.22, 296.23, 296.24, 296.25, 296.26, 296.3-, 296.30, 296.31, 296.32, 296.33, 296.34, 296.35, 296.36, 296.9-, 296.90, 296.99, 300.00, 300.01, 300.02, 300.09, 300.20, 300.21, 300.22, 300.23, 300.29, 300.3-, 300.4-, 308.0-, 308.3-, 308.4-, 308.9-, 309.0-, 309.1-, 309.24, 309.28, 309.29, 309.81, 311.-, V11.2, V79.0</p> <p>RFV:<br/>           1100.0, 1105.0, 1110.0, 2310.0</p>                                                                                                                                                                                                                                                                                                                                                                                                                                         |
| Back and chronic pain  | <p>ICD-9-CM:<br/>           307.80, 338, 354, 355, 356, 357, 370.89, 719.4, 720.1-, 721, 722, 723, 724, 728.85, 729.8, 729.1-, 729.2-, 729.5-, 729.9-, 729.90, 729.99, 737, 739.0-, 739.1-, 739.2-, 739.3-, 739.4-, 739.5-, 739.6-, 739.7-, 739.8-, 780.96, 840, 841, 842, 843, 844, 845, 846, 847, 848</p> <p>RFV:<br/>           1055.0, 1060.0, 1060.1, 1060.2, 1060.3, 1900.0, 1900.1, 1900.2, 1900.3, 1905.0, 1905.1, 1905.2, 1905.3, 1910.0, 1910.1, 1910.2, 1910.3, 1915.0, 1915.1, 1915.2, 1915.3, 1920.0, 1920.1, 1920.2, 1920.3, 1925.0, 1925.1, 1925.2, 1925.3, 1930.0, 1930.1, 1930.2, 1930.3, 1935.0, 1935.1, 1935.2, 1935.3, 1940.0, 1940.1, 1940.2, 1940.3, 1945.0, 1945.1, 1945.2, 1945.3, 1950.0, 1950.1, 1950.2, 1950.3, 1955.0, 1955.1, 1955.2, 1955.3, 1960.0, 1960.1, 1960.2, 1960.3, 1965.0, 1965.1, 1965.2, 1965.3, 1970.0, 1970.1, 1970.2, 1970.3, 1980.0, 2900.0, 2905.0, 2910.0</p> |
| Insomnia               | <p>ICD-9-CM:<br/>           307.4-, 307.40, 307.41, 307.42, 307.45, 307.46, 307.47, 307.48, 307.49, 327.0-, 327.00, 327.01, 327.02, 327.09, 780.5-, 780.50, 780.51, 780.52, 780.55, 780.56, 780.59, V69.4-</p> <p>RFV:<br/>           1135.0, 1135.1</p>                                                                                                                                                                                                                                                                                                                                                                                                                                                                                                                                                                                                                                                      |
| Neurologic conditions  | <p>ICD-9-CM:<br/>           307.81, 327.52, 332, 333, 339, 340, 345, 346, 386, 438.85, 780.3, 780.4-, 781.0-, 784</p> <p>RFV:<br/>           1200.0, 1205.0, 1207.0, 1210.0, 1220.0, 1220.1, 1220.2, 1220.3, 1220.4, 1225.0, 1410.1, 2365.0</p>                                                                                                                                                                                                                                                                                                                                                                                                                                                                                                                                                                                                                                                               |

**eTable 2.** Characteristics of All Visits, 2003-2015

| Characteristic                     | Number of Ambulatory Visits (%*)   |                                    |                                      |
|------------------------------------|------------------------------------|------------------------------------|--------------------------------------|
|                                    | 2003<br>(unweighted<br>N = 20,884) | 2015<br>(unweighted<br>N = 24,273) | Total<br>(unweighted<br>N = 386,457) |
| U.S. weighted population of visits | 736,631,072                        | 841,252,183                        | 10,126,576,829                       |
| Age                                |                                    |                                    |                                      |
| 18-44                              | 6,639 (34.2)                       | 6,428 (27.4)                       | 116,099 (30.9)                       |
| 45-64                              | 7,359 (34.9)                       | 8,311 (36.3)                       | 140,361 (36.2)                       |
| ≥65                                | 6,886 (30.9)                       | 9,534 (36.3)                       | 129,997 (32.9)                       |
| Sex                                |                                    |                                    |                                      |
| Male                               | 8,724 (37.9)                       | 10,386 (39.1)                      | 157,463 (39.1)                       |
| Female                             | 12,160 (62.1)                      | 13,887 (60.9)                      | 228,994 (60.9)                       |
| Race                               |                                    |                                    |                                      |
| White                              | 18,387 (85.8)                      | 20,942 (78.0)                      | 331,350 (84.5)                       |
| Black                              | 1,756 (9.4)                        | 2,299 (13.3)                       | 37,502 (10.4)                        |
| Other                              | 741 (4.8)                          | 1,032 (8.7)                        | 17,605 (5.1)                         |
| Insurance                          |                                    |                                    |                                      |
| Private                            | 10,926 (54.1)                      | 11,362 (45.2)                      | 185,335 (50.5)                       |
| Medicare                           | 6,157 (27.5)                       | 8,300 (31.9)                       | 117,258 (29.5)                       |
| Medicaid                           | 1,320 (6.9)                        | 2,149 (9.8)                        | 30,114 (7.5)                         |
| Other                              | 2,481 (11.5)                       | 2,462 (13.1)                       | 53,750 (12.5)                        |
| Region                             |                                    |                                    |                                      |
| Northeast                          | 4,451 (21.0)                       | 4,558 (20.4)                       | 67,836 (19.7)                        |
| Midwest                            | 4,417 (20.2)                       | 7,304 (17.2)                       | 95,716 (20.2)                        |
| South                              | 7,376 (37.0)                       | 6,685 (36.1)                       | 131,645 (38.0)                       |
| West                               | 4,640 (21.8)                       | 5,726 (26.3)                       | 91,260 (22.1)                        |
| Location                           |                                    |                                    |                                      |
| Urban                              | 18,489 (88.0)                      | 22,458 (93.4)                      | 341,250 (88.9)                       |
| Rural                              | 2,395 (12.0)                       | 1,815 (6.6)                        | 45,207 (11.1)                        |

\* Percentages are weighted to provide population estimates.

**eTable 3.** Benzodiazepine Prescribing Rate by Year, by Specialty and Indication, 2003-2015

| Characteristic       | Ambulatory Visits Resulting in Benzodiazepine Prescription, % |      |      |      |      |      |      |      |      |      |      |      |      |
|----------------------|---------------------------------------------------------------|------|------|------|------|------|------|------|------|------|------|------|------|
|                      | 2003                                                          | 2004 | 2005 | 2006 | 2007 | 2008 | 2009 | 2010 | 2011 | 2012 | 2013 | 2014 | 2015 |
| All                  | 3.8                                                           | 4.1  | 5.2  | 5.5  | 6.2  | 6.3  | 6.5  | 6.4  | 7.3  | 6.7  | 7.7  | 8.2  | 7.4  |
| Specialty            |                                                               |      |      |      |      |      |      |      |      |      |      |      |      |
| Primary care         | 3.6                                                           | 3.9  | 5.2  | 5.7  | 6.5  | 6.8  | 6.7  | 6.9  | 7.1  | 7.5  | 8.6  | 8.2  | 7.5  |
| Medical specialties  | 3.3                                                           | 4.2  | 5.2  | 6.3  | 4.8  | 7.0  | 6.5  | 6.2  | 6.8  | 5.4  | 6.7  | 8.0  | 6.0  |
| Surgery              | 1.0                                                           | 0.9  | 1.6  | 1.6  | 2.6  | 2.0  | 2.5  | 2.7  | 3.5  | 3.1  | 3.5  | 3.8  | 4.4  |
| Psychiatry           | 29.6                                                          | 26.8 | 33.6 | 26.8 | 31.1 | 29.6 | 29.4 | 32.1 | 32.9 | 28.8 | 25.7 | 29.1 | 30.2 |
| Indication           |                                                               |      |      |      |      |      |      |      |      |      |      |      |      |
| Anxiety & depression | 26.6                                                          | 23.9 | 29.2 | 28.0 | 31.7 | 34.8 | 30.6 | 32.4 | 34.6 | 30.0 | 30.5 | 32.5 | 33.5 |
| Back & chronic pain  | 3.6                                                           | 4.7  | 5.1  | 6.0  | 7.7  | 7.0  | 7.6  | 6.4  | 9.0  | 9.0  | 10.4 | 9.5  | 8.5  |
| Insomnia             | 26.9                                                          | 21.2 | 18.9 | 23.4 | 21.9 | 27.8 | 27.4 | 21.7 | 22.4 | 25.6 | 22.0 | 24.0 | 25.6 |
| Neurologic           | 6.8                                                           | 6.3  | 7.2  | 7.1  | 10.0 | 8.9  | 10.2 | 8.4  | 10.0 | 9.7  | 11.1 | 11.7 | 8.7  |
| Other                | 1.8                                                           | 2.2  | 3.4  | 3.7  | 3.5  | 4.0  | 4.1  | 4.4  | 4.6  | 4.0  | 4.6  | 5.0  | 4.4  |



**eTable 4.** Predictors Associated With Use of Benzodiazepines

| Predictor                   | Adjusted OR [95% CI] <sup>a</sup> |
|-----------------------------|-----------------------------------|
| Age                         |                                   |
| 18-44                       | 1.00                              |
| 45-64                       | 1.40 [1.33, 1.48]                 |
| ≥65                         | 0.79 [0.73, 0.86]                 |
| Sex                         |                                   |
| Male                        | 1.00                              |
| Female                      | 1.31 [1.24, 1.38]                 |
| Race                        |                                   |
| White                       | 1.00                              |
| Black                       | 0.63 [0.56, 0.70]                 |
| Other                       | 0.52 [0.44, 0.62]                 |
| Insurance                   |                                   |
| Private                     | 1.00                              |
| Medicare                    | 1.81 [1.69, 1.95]                 |
| Medicaid                    | 1.54 [1.38, 1.71]                 |
| Other/ <sup>uninsured</sup> | 1.36 [1.23, 1.49]                 |
| Region                      |                                   |
| Northeast                   | 1.00                              |
| Midwest                     | 1.04 [0.91, 1.18]                 |
| South                       | 1.08 [0.93, 1.24]                 |
| West                        | 0.98 [0.86, 1.11]                 |
| Location                    |                                   |
| Urban                       | 1.00                              |
| Rural                       | 1.07 [0.92, 1.25]                 |

<sup>a</sup> Adjusted for year, age, sex, race, insurance, region, and location.
